# Supplementary material for: Evaluation of debris-flow building damage forecasts
Source: Copernicus journal article supplement (doi:10.5194/nhess-24-1459-2024), 2024-04-29
Supplement: Supplementary file 1 [file nhess-24-1459-2024-supplement.pdf]

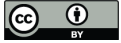

*Supplement of*

## **Evaluation of debris-flow building damage forecasts**

**Katherine R. Barnhart et al.**

*Correspondence to:* Katherine R. Barnhart ([krbarnhart@usgs.gov](mailto:krbarnhart@usgs.gov))

The copyright of individual parts of the supplement might differ from the article licence.

## 5 Supplement

- 10 Any use of trade, product, or firm names is for descriptive purposes only and does not imply endorsement by the U.S. Government.

**Table S1. Building damage states, 2018 Montecito debris-flow event.**

| CAL FIRE inspection damage state   | Damage state classification | Domain    |            |        | Total† |
|------------------------------------|-----------------------------|-----------|------------|--------|--------|
|                                    | D <sub>s</sub>              | Montecito | San Ysidro | Romero |        |
| Unimpacted *                       | 0                           | 1753      | 1380       | 986    | 4002   |
| Affected                           | 0                           | 60        | 14         | 53     | 127    |
| Minor damage                       | 0                           | 52        | 44         | 32     | 126    |
| Major damage                       | 1                           | 57        | 37         | 21     | 114    |
| Destroyed                          | 1                           | 54        | 94         | 14     | 162    |
| Total number of impacted buildings |                             | 223       | 189        | 120    | 529    |
| Total number of buildings          |                             | 2199      | 1758       | 1226   | 5060   |

Notes: \* Unimpacted building from Open Street Map.

†One hundred and seventeen unimpacted, two minor damage, and one major damage state buildings present in overlapping portions of the simulation domains.

CAL FIRE -- California Department of Forestry and Fire Protection

**Table S2. Volume ranges for event magnitude forecast bias**

| Event magnitude forecast bias | Interpretation                                | Volume range (mean), 10 <sup>3</sup> m <sup>3</sup> |                    |                  | Number of simulations* |                   |               |
|-------------------------------|-----------------------------------------------|-----------------------------------------------------|--------------------|------------------|------------------------|-------------------|---------------|
|                               |                                               | Montecito domain                                    | San Ysidro domain  | Romero domain    | Montecito domain       | San Ysidro domain | Romero domain |
| Very underforecast            | Observed event size was larger than forecast  | <186<br>(139)                                       | <186<br>(137)      | <117<br>(108)    | 160/268/140            | 160/268/56        | 44/68/36      |
|                               | Underforecast                                 | 186–372<br>(270)                                    | 186–372<br>(273)   | 117–234<br>(170) | 180/304/192            | 180/304/92        | 176/304/204   |
| Unbiased                      | Observed event size was correctly forecast    | 372–741<br>(538)                                    | 372–741<br>(532)   | 234–468<br>(341) | 180/300/168            | 180/300/152       | 180/296/204   |
|                               | Overforecast                                  | 741–1480<br>(1069)                                  | 741–1480<br>(1082) | 468–933<br>(669) | 180/300/184            | 180/300/164       | 180/304/208   |
| Very overforecast             | Observed event size was smaller than forecast | >1480<br>(2889)                                     | >1480<br>(2898)    | >933<br>(2435)   | 320/528/400            | 320/528/404       | 440/728/556   |

Note: \*Number of simulations indicated as R/F/D where R, F, and D are the number of simulations from RAMMS, FLO-2D, and D-Claw, respectively (Christen et al., 2010; George and Iverson, 2014; Iverson and George, 2014; O’Brien et al., 1993; O’Brien, 2020).

20 **Table S3. Distribution of number of stories in buildings damaged by the Montecito event.**

| Number of stories | Count | Percent |
|-------------------|-------|---------|
| 1                 | 165   | 83.3%   |
| 2                 | 33    | 16.7%   |

**Table S4. Distribution of building ages in buildings damaged by the Montecito event.**

| Building age | Count | Percent |
|--------------|-------|---------|
| Before 1941  | 29    | 18.0%   |
| 1941-1975    | 84    | 52.2%   |
| After 1975   | 48    | 29.8%   |

25

**Table S5. Logistic regression fit for prediction of simplified damage state (D<sub>s</sub>).**

|                              | <i>Dependent variable:</i> |
|------------------------------|----------------------------|
|                              | D <sub>s</sub>             |
| ln(h), β <sub>1</sub>        | 2.521*** (2.175, 2.867)    |
| Constant, β <sub>0</sub>     | 1.927*** (1.584, 2.269)    |
| Number of observations       | 4,531                      |
| Log Likelihood               | -202.693                   |
| Akaike Information Criterion | 409.386                    |

*Note:*

Significance levels denoted by asterixis: \* indicates  $p < 0.1$ , \*\* indicates  $p < 0.05$ , and \*\*\* indicates  $p < 0.01$ , where  $p$  is the probability the coefficient is not zero. Values given in parenthesis denote the 90% confidence interval for the coefficient.

**Table S6. Forecast performance metrics for probabilistic forecasts for simplified damage state (D<sub>s</sub>) by model.**

| Model  | Independent variable | Volume class* | True positive | False positive | True negative | False negative | False Alarm Ratio | Hit rate | Bias  | Threat Score |
|--------|----------------------|---------------|---------------|----------------|---------------|----------------|-------------------|----------|-------|--------------|
| RAMMS  | h                    | 1             | 0.01          | 0.01           | 0.93          | 0.05           | 0.40              | 0.21     | 0.35  | 0.18         |
| RAMMS  | hv <sup>2</sup>      | 1             | 0.00          | 0.00           | 0.94          | 0.06           | 0.58              | 0.03     | 0.07  | 0.03         |
| RAMMS  | h                    | 2             | 0.03          | 0.05           | 0.89          | 0.03           | 0.64              | 0.46     | 1.27  | 0.25         |
| RAMMS  | hv <sup>2</sup>      | 2             | 0.01          | 0.01           | 0.93          | 0.05           | 0.57              | 0.12     | 0.29  | 0.11         |
| RAMMS  | h                    | 3             | 0.04          | 0.13           | 0.81          | 0.02           | 0.76              | 0.67     | 2.84  | 0.21         |
| RAMMS  | hv <sup>2</sup>      | 3             | 0.02          | 0.03           | 0.91          | 0.05           | 0.67              | 0.25     | 0.76  | 0.17         |
| RAMMS  | h                    | 4             | 0.05          | 0.24           | 0.70          | 0.01           | 0.84              | 0.77     | 4.73  | 0.15         |
| RAMMS  | hv <sup>2</sup>      | 4             | 0.02          | 0.07           | 0.87          | 0.04           | 0.76              | 0.36     | 1.53  | 0.17         |
| RAMMS  | h                    | 5             | 0.05          | 0.35           | 0.59          | 0.01           | 0.88              | 0.81     | 6.59  | 0.12         |
| RAMMS  | hv <sup>2</sup>      | 5             | 0.03          | 0.20           | 0.74          | 0.03           | 0.86              | 0.53     | 3.80  | 0.12         |
| FLO-2D | h                    | 1             | 0.01          | 0.01           | 0.93          | 0.05           | 0.29              | 0.22     | 0.32  | 0.21         |
| FLO-2D | hv <sup>2</sup>      | 1             | 0.00          | 0.00           | 0.94          | 0.06           | 0.40              | 0.01     | 0.02  | 0.01         |
| FLO-2D | h                    | 2             | 0.04          | 0.05           | 0.89          | 0.03           | 0.56              | 0.58     | 1.32  | 0.33         |
| FLO-2D | hv <sup>2</sup>      | 2             | 0.01          | 0.00           | 0.94          | 0.06           | 0.38              | 0.09     | 0.14  | 0.09         |
| FLO-2D | h                    | 3             | 0.05          | 0.16           | 0.78          | 0.01           | 0.77              | 0.78     | 3.39  | 0.22         |
| FLO-2D | hv <sup>2</sup>      | 3             | 0.01          | 0.02           | 0.92          | 0.05           | 0.61              | 0.16     | 0.42  | 0.13         |
| FLO-2D | h                    | 4             | 0.06          | 0.34           | 0.60          | 0.01           | 0.86              | 0.92     | 6.47  | 0.14         |
| FLO-2D | hv <sup>2</sup>      | 4             | 0.02          | 0.05           | 0.89          | 0.04           | 0.71              | 0.30     | 1.05  | 0.17         |
| FLO-2D | h                    | 5             | 0.06          | 0.58           | 0.36          | 0.00           | 0.91              | 0.97     | 10.50 | 0.09         |
| FLO-2D | hv <sup>2</sup>      | 5             | 0.04          | 0.26           | 0.68          | 0.02           | 0.87              | 0.65     | 4.88  | 0.12         |
| D-Claw | h                    | 1             | 0.00          | 0.00           | 0.94          | 0.06           | 1.00              | 0.00     | 0.00  | 0.00         |
| D-Claw | hv <sup>2</sup>      | 1             | 0.00          | 0.00           | 0.94          | 0.06           | 0.50              | 0.00     | 0.01  | 0.00         |
| D-Claw | h                    | 2             | 0.03          | 0.03           | 0.91          | 0.03           | 0.50              | 0.43     | 0.86  | 0.30         |
| D-Claw | hv <sup>2</sup>      | 2             | 0.01          | 0.01           | 0.93          | 0.05           | 0.53              | 0.18     | 0.39  | 0.15         |
| D-Claw | h                    | 3             | 0.04          | 0.10           | 0.84          | 0.02           | 0.71              | 0.70     | 2.38  | 0.26         |
| D-Claw | hv <sup>2</sup>      | 3             | 0.03          | 0.06           | 0.88          | 0.03           | 0.66              | 0.48     | 1.43  | 0.25         |
| D-Claw | h                    | 4             | 0.05          | 0.27           | 0.67          | 0.01           | 0.83              | 0.88     | 5.30  | 0.16         |
| D-Claw | hv <sup>2</sup>      | 4             | 0.05          | 0.20           | 0.74          | 0.02           | 0.81              | 0.74     | 3.97  | 0.17         |
| D-Claw | h                    | 5             | 0.06          | 0.52           | 0.41          | 0.00           | 0.90              | 0.96     | 9.58  | 0.10         |
| D-Claw | hv <sup>2</sup>      | 5             | 0.05          | 0.48           | 0.46          | 0.01           | 0.90              | 0.89     | 8.80  | 0.10         |

Note: \*Volume class values of 1, 2, 3, 4, and 5 refer to very underforecast, underforecast, unbiased, overforecast, and very overforecast event magnitude forecast bias categories, respectively.

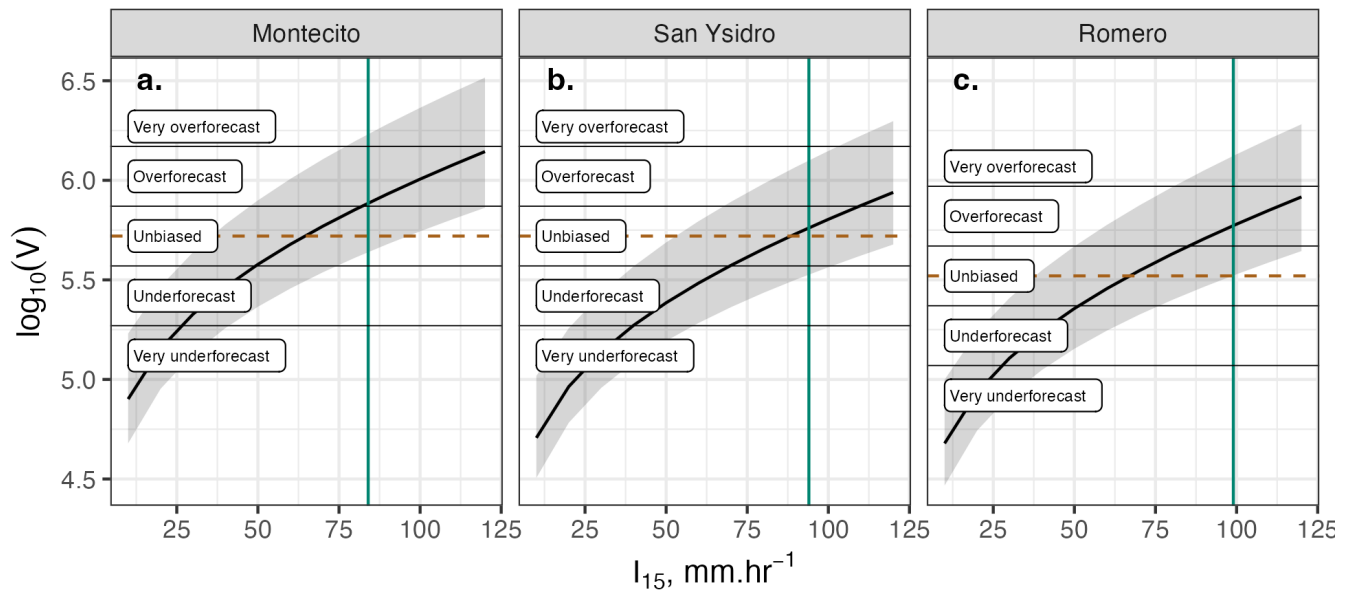

35

Figure S1. Relation between 15-minute rainfall intensity,  $I_{15}$ , and simulated event size,  $\log(V)$ , depicted as the black curved line, with 95% confidence intervals depicted as the grey shaded region. The simulated event size comes from combining the sediment volume produced by the U.S. Geological Survey hazard assessment for the Thomas Fire (U.S. Geological Survey, 2018) generated using the Gartner et al. (2014) empirical model and the volume of water that would fall on the considered basins in 15 minutes. The estimated rainfall for each domain is depicted as the vertical green line and the estimated event size as the horizontal brown dashed line. Thin black horizontal lines depict the boundaries between the five event magnitude bias volume classes.

40



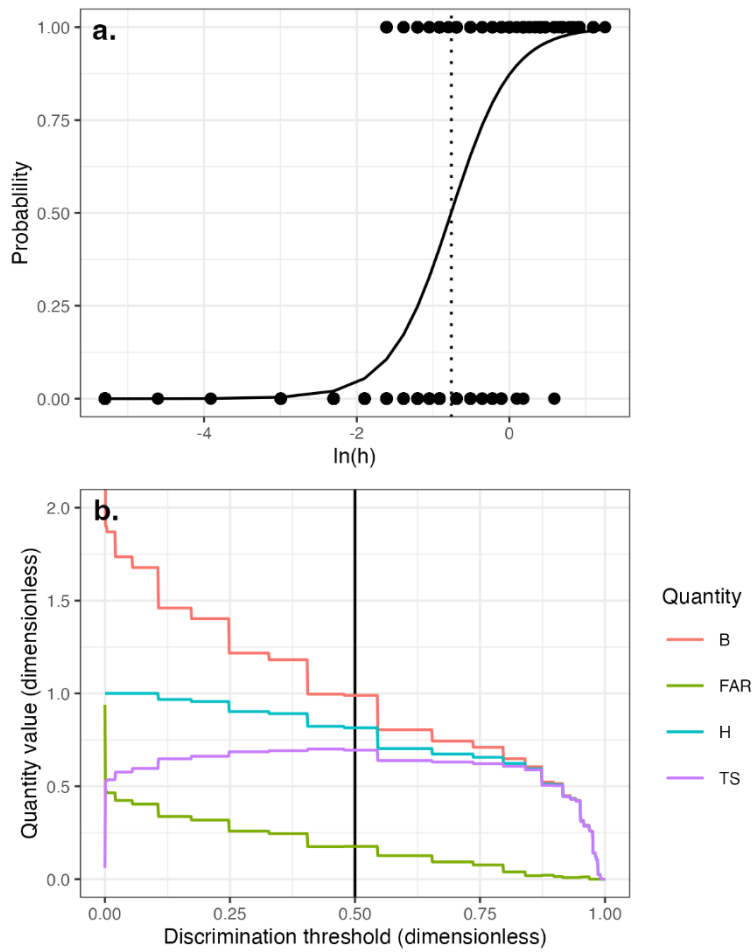

45 **Figure S2. Probability of the simplified damage state ( $D_s$ ) being equal to one (damage occurring) as a function of natural logarithm of debris-flow depth ( $\ln(h)$ ) based on the logistic regression model (a) and the variation in bias (B), false alarm ratio (FAR), the hit rate (H), and the threat score (TS) as a function of the discrimination threshold (b). Black dots in (a) depict data used to fit the logistic regression model (curved black line). The critical value for the threshold probability was selected as 0.5 because that value maximizes the TS and puts B near unity (b) and corresponds to a value of  $\ln(h)$  of -0.76 or a value for h of 0.47 m (dashed vertical line in (a)).**

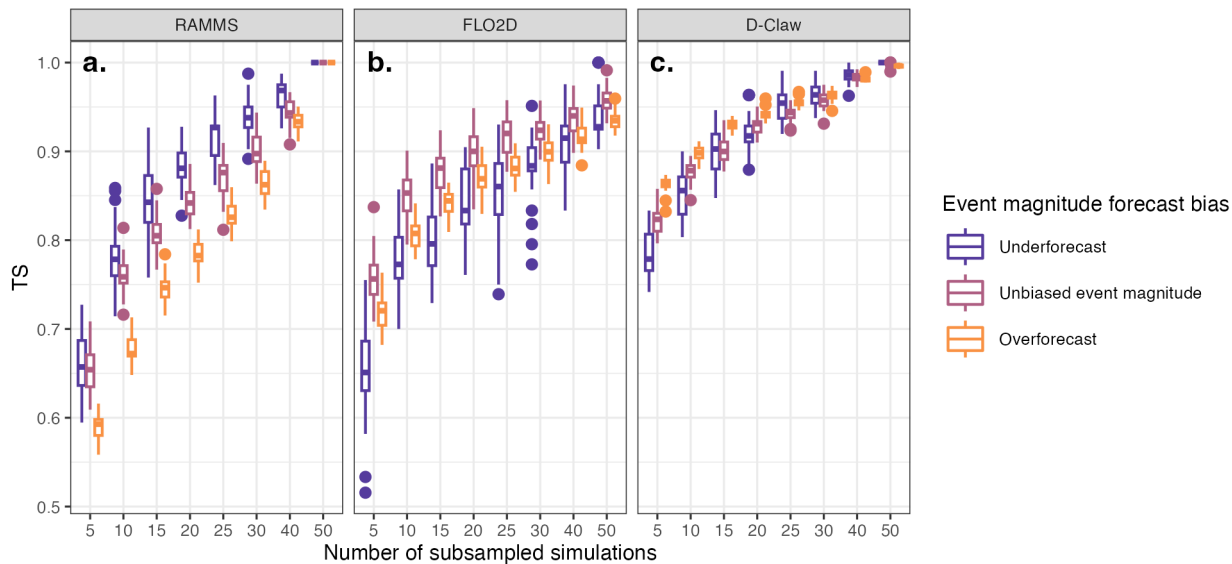

50

Figure S3. Consistency between forecasts generated by the full set of simulations and subsampled sets of simulations from the bootstrapping analysis as measured by the threat score, TS. Boxplots show the distribution of TS as a function of the number of subsampled simulations for three models and three event magnitude forecast bias categories. Boxplot depicts 25<sup>th</sup>, 50<sup>th</sup>, and 75<sup>th</sup> percentiles as horizontal lines; whiskers extend vertically to the observation no farther than 1.5x the interquartile range; and dots depict any outlying points.

55

## References

- Christen, M., Kowalski, J., and Bartelt, P.: RAMMS: Numerical simulation of dense snow avalanches in three-dimensional terrain, *Cold Reg. Sci. Technol.*, 63, 1–14, <https://doi.org/10.1016/j.coldregions.2010.04.005>, 2010.
- Gartner, J. E., Cannon, S. H., and Santi, P. M.: Empirical models for predicting volumes of sediment deposited by debris flows and sediment-laden floods in the transverse ranges of southern California, *Eng. Geol.*, 176, 45–56, <https://doi.org/10.1016/j.enggeo.2014.04.008>, 2014.
- George, D. L. and Iverson, R. M.: A depth-averaged debris-flow model that includes the effects of evolving dilatancy. II. Numerical predictions and experimental tests, *Proc. R. Soc. Math. Phys. Eng. Sci.*, 470, 20130820, <https://doi.org/10.1098/rspa.2013.0820>, 2014.
- Iverson, R. M. and George, D. L.: A depth-averaged debris-flow model that includes the effects of evolving dilatancy. I. Physical basis, *Proc. R. Soc. Math. Phys. Eng. Sci.*, 470, 20130819, <https://doi.org/10.1098/rspa.2013.0819>, 2014.
- O’Brien, J. S.: FLO-2D reference manual, Tech. Rep., <https://documentation.flo-2d.com/>, 2020.
- O’Brien, J. S., Julien, P. Y., and Fullerton, W. T.: Two-dimensional water flood and mudflow simulation, *J. Hydraul. Eng.*, 119, 244–261, [https://doi.org/10.1061/\(ASCE\)0733-9429\(1993\)119:2\(244\)](https://doi.org/10.1061/(ASCE)0733-9429(1993)119:2(244)), 1993.
- OpenStreetMap contributors: Planet dump retrieved from <https://planet.osm.org>, 2021.
- U.S. Geological Survey: Emergency assessment of post-fire debris-flow hazards, 2017 Thomas Fire, retrieved from [https://landslides.usgs.gov/static/landslides-realtime/fires/20171204\\_thomas/PostFireDebrisFlowEstimates.zip](https://landslides.usgs.gov/static/landslides-realtime/fires/20171204_thomas/PostFireDebrisFlowEstimates.zip), 2018.
